# Supplementary material
Source: Springer Nature journal article supplement (https://www.springermedizin.de/resource/supplementary/12939_2013_365_MOESM2_ESM.pdf/9550978)

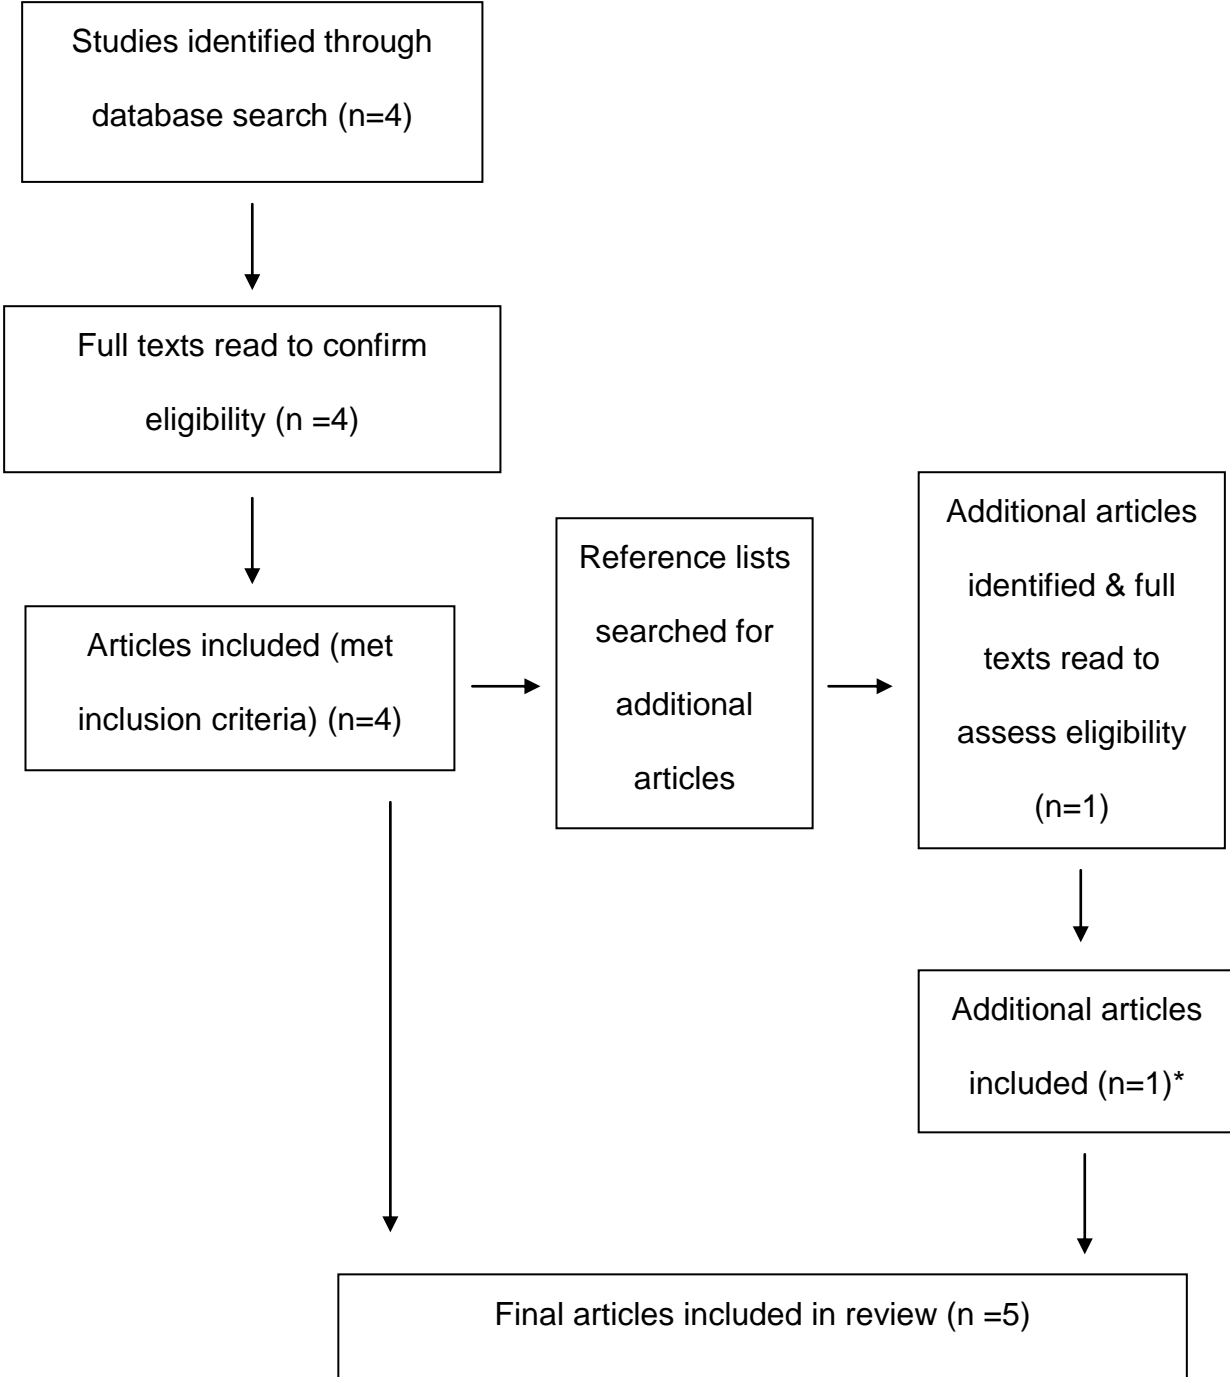

\* involves ICIDH-2, predecessor to the ICF

Supplement: MOESM2 [file 9550978]
